# Supplementary material for: Non-homologous end joining shapes the genomic rearrangement landscape of chromothripsis from mitotic errors
Source: PubMed Central journal article supplement (PMC11224358; doi:10.1038/s41467-024-49985-5), 2024-07-04
Supplement: 41467_2024_49985_MOESM1_ESM.pdf [file 41467_2024_49985_MOESM1_ESM.pdf]

## **Inventory of Supplementary Information for Hu et al.**

**Supplementary Fig. 1.** Generation of DSB repair knockout cells by CRISPR/Cas9 editing.

**Supplementary Fig. 2.** Induction of micronuclei and chromosome fragmentation in knockout cells.

**Supplementary Fig. 3.** Genomic rearrangement landscape of mis-segregated chromosomes following transient centromere inactivation.

**Supplementary Fig. 4.** Genomic rearrangement landscape of mis-segregated chromosomes following sustained centromere inactivation.

**Supplementary Fig. 5.** Characterization of genomic rearrangements in DNA-PKcs-deficient cells.

**Supplementary Fig. 6.** Complex rearrangements in DNA-PKcs-deficient cells arise from functional redundancies of the NHEJ pathway.

**Supplementary Fig. 7.** Nuclear envelope rupture triggers the loss of DNA-PKcs from micronuclei.

**Supplementary Fig. 8.** Depletion of DNA-PKcs prolongs 53BP1 residence time at MN bodies and triggers cell cycle arrest.

**Supplementary Fig. 9.** Characterization of calyculin A-induced premature chromosome condensation.

**Supplementary Fig. 10.** Induction of genome-wide or Cas9-induced DNA breaks on nuclear chromosomes facilitates translocations involving the micronucleated chromosome.

**Supplementary Table 1.** List of oligonucleotide sequences used in this study.

**Supplementary Table 2.** List of primary antibodies used in this study.

**Source Data** containing scans of uncropped blots and flow cytometry gating strategies

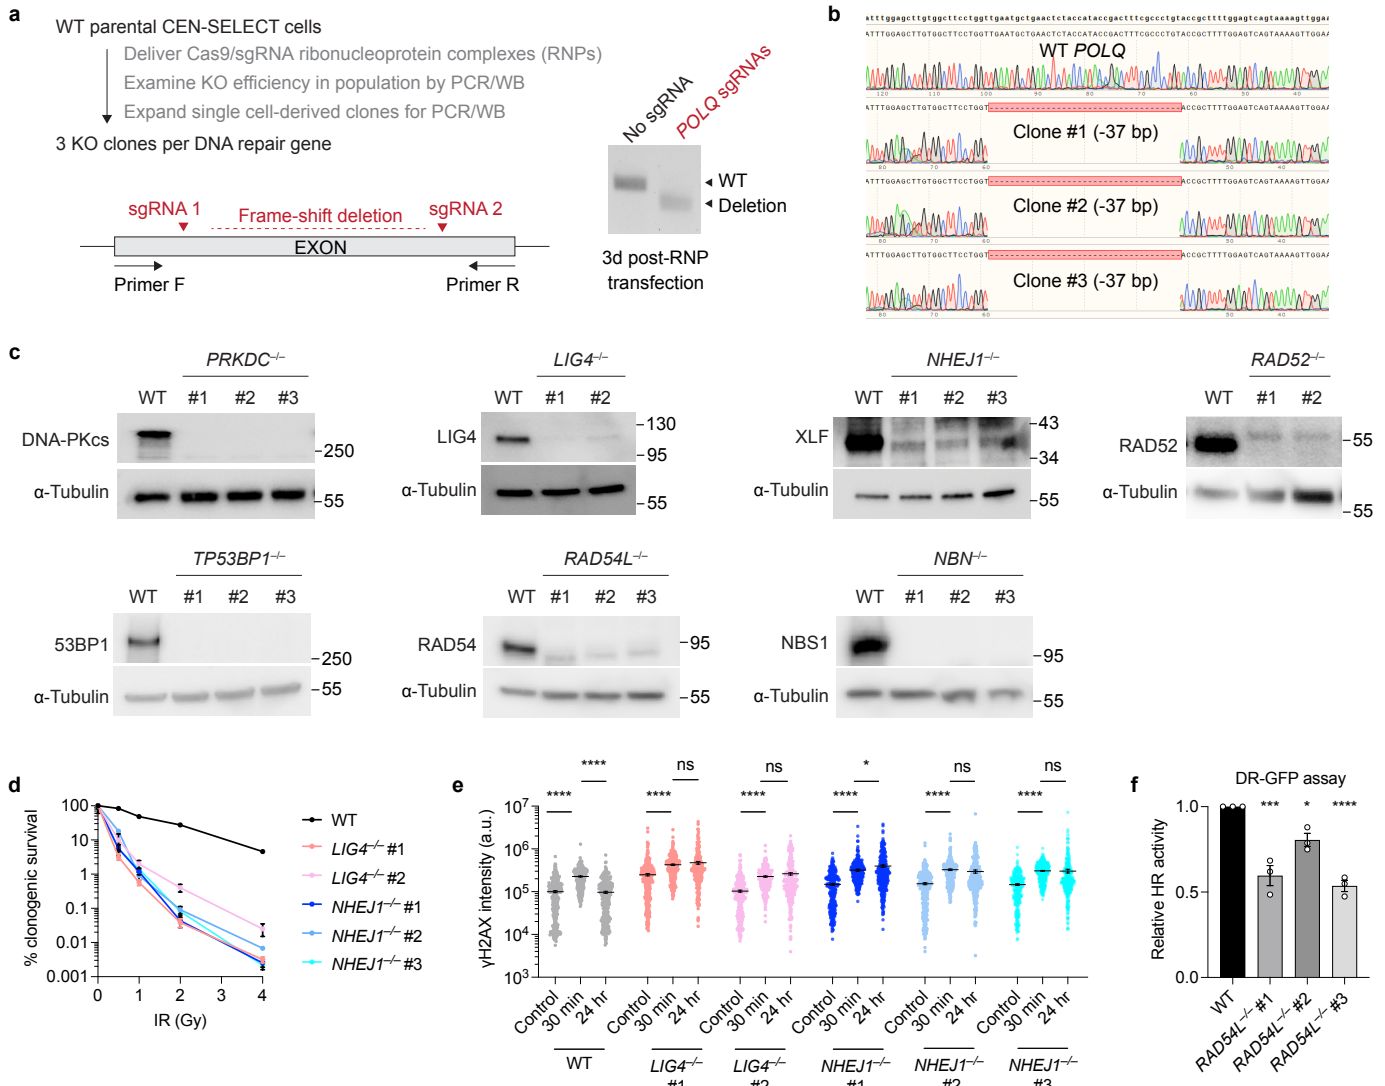

**Supplementary Fig. 1. Generation of DSB repair knockout cells by CRISPR/Cas9 editing.**

**a)** Experimental schematic for generating CRISPR/Cas9-mediated biallelic knockout clones. Cleavage at two sgRNA sequences yields a frameshift deletion that can be detected by PCR. **b)** Sanger sequencing confirmation of predicted 37 base pair frameshift deletion in the *POLQ* gene in three independent clones. **c)** Confirmation of KO clones by immunoblotting. Molecular weight markers are indicated in kilodaltons. **d)** Clonogenic assay following exposure of *LIG4* and *XLF* KO clones to the indicated doses of ionizing radiation (IR). **e)** Fluorescence intensity of  $\gamma$ H2AX in the nucleus of *LIG4* and *XLF* KO clones following exposure to 1 Gy IR and recovery for 30 min or 24 hrs. Controls represent non-irradiated cells. Data pooled from (left to right):  $n = 303, 325, 311, 326, 310, 250, 304, 317, 309, 301, 297, 304, 321, 315, 297, 301, 323,$  and  $297$  cells. Negative values were excluded from the plot but considered in the statistical analysis. **f)** Measurement of relative levels of homologous recombination in *RAD54* KO clones using the DR-GFP assay. Data represent the mean  $\pm$  SEM from  $n = 3$  independent experiments. Statistical analyses were calculated by ordinary one-way ANOVA test with multiple comparisons. ns, not significant; \* $p \leq 0.05$ ; \*\* $p \leq 0.01$ ; \*\*\* $p \leq 0.001$ ; \*\*\*\* $p \leq 0.0001$ . Source data are provided as a Source Data file.

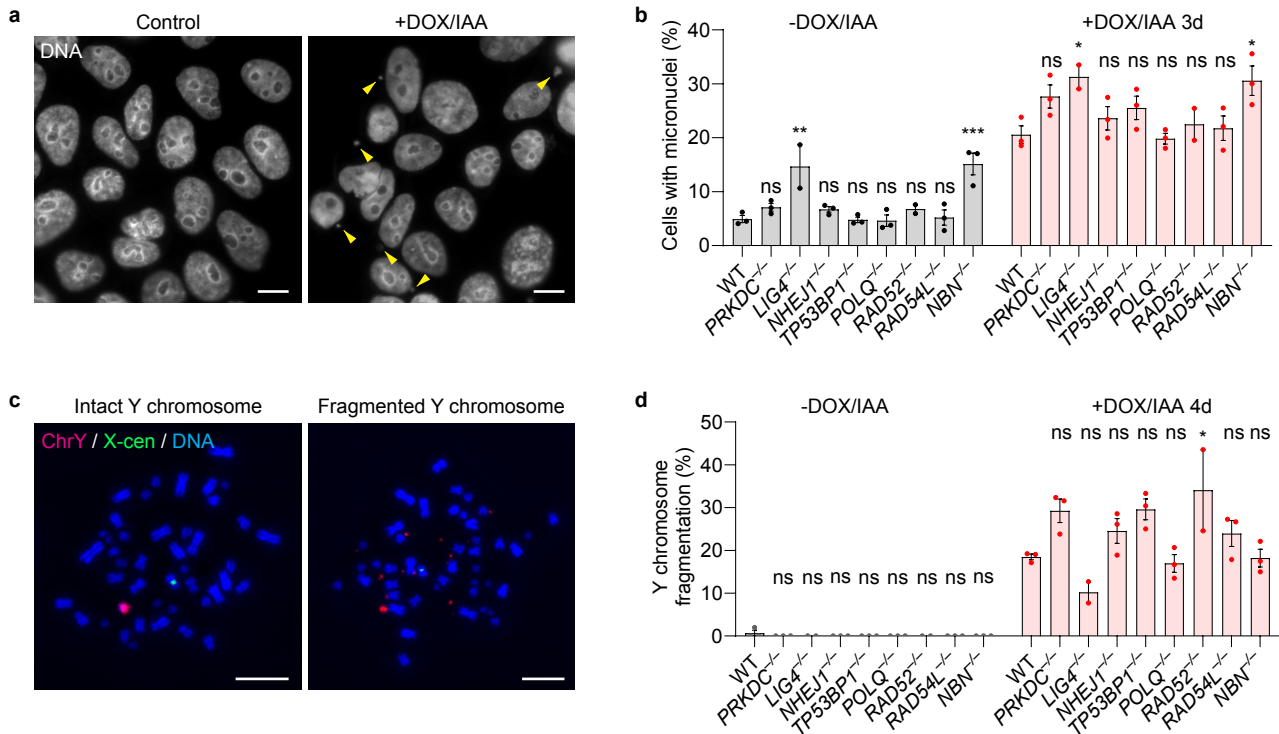

**Supplementary Fig. 2. Induction of micronuclei and chromosome fragmentation in knockout cells.**

**a)** Representative images of DNA-PKcs KO cells with micronuclei before and after induction with DOX/IAA. Scale bar, 10  $\mu$ m. **b)** The percentage of cells with micronuclei with and without 3d DOX/IAA treatment. Data pooled from (left to right): 1,367, 1,711, 2,208, 1,236, 340, 407, 1,554, 1,709, 396, 335, 1,985, 1,769, 935, 295, 1,256, 1,782, 706, and 736 cells. **c)** Images of metaphase spreads with intact or fragmented Y chromosomes after 4d DOX/IAA treatment. Scale bar, 10  $\mu$ m. **d)** Frequency of Y chromosome fragmentation. Only Y chromosome-positive metaphase spreads were scored. Data pooled from (left to right): 168, 267, 113, 226, 81, 141, 162, 162, 148, 147, 184, 213, 79, 123, 120, 186, 215, and 255 metaphase spreads. Bar graphs in **(b)** and **(d)** represent the mean  $\pm$  SEM from  $n = 3$  independent experiments for WT controls,  $n = 2$  KO clones for LIG4 and RAD52, and  $n = 3$  KO clones for DNA-PKcs, XLF, 53BP1, Pol $\theta$ , RAD54, and NBS1; statistical analyses were calculated by ordinary one-way ANOVA test with multiple comparisons. ns, not significant; \* $p \leq 0.05$ ; \*\* $p \leq 0.01$ ; \*\*\* $p \leq 0.001$ ; \*\*\*\* $p \leq 0.0001$ . Source data are provided as a Source Data file.

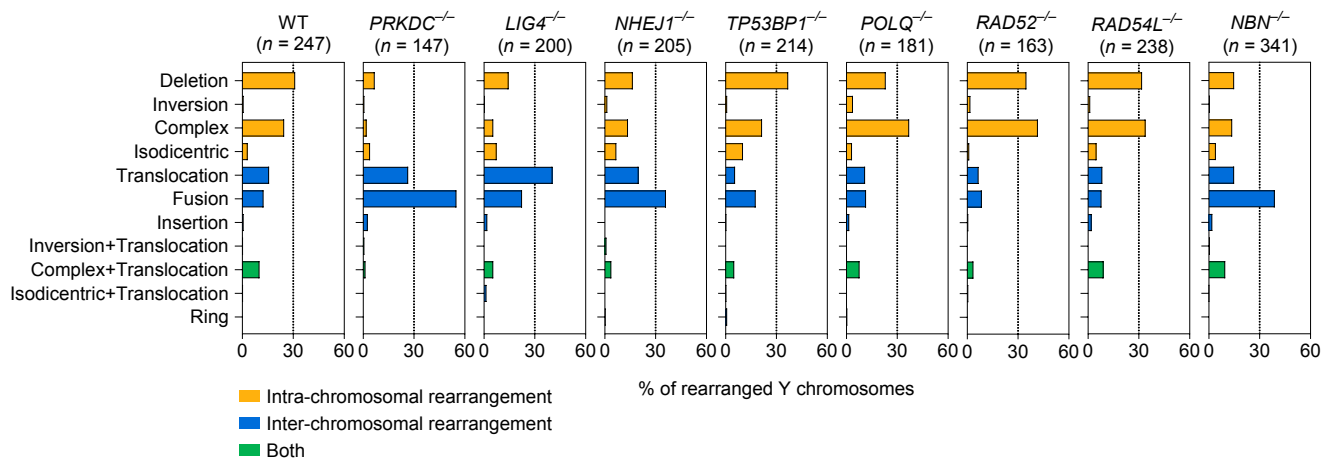

**Supplementary Fig. 3. Genomic rearrangement landscape of mis-segregated chromosomes following transient centromere inactivation.** Distribution of Y chromosome rearrangement types as determined by metaphase FISH following 3d DOX/IAA treatment and G418 selection. Sample sizes indicate the number of rearranged Y chromosomes examined; data are pooled from 3 independent experiments for WT cells and 2-3 independent KO clones per gene. Source data are provided as a Source Data file.



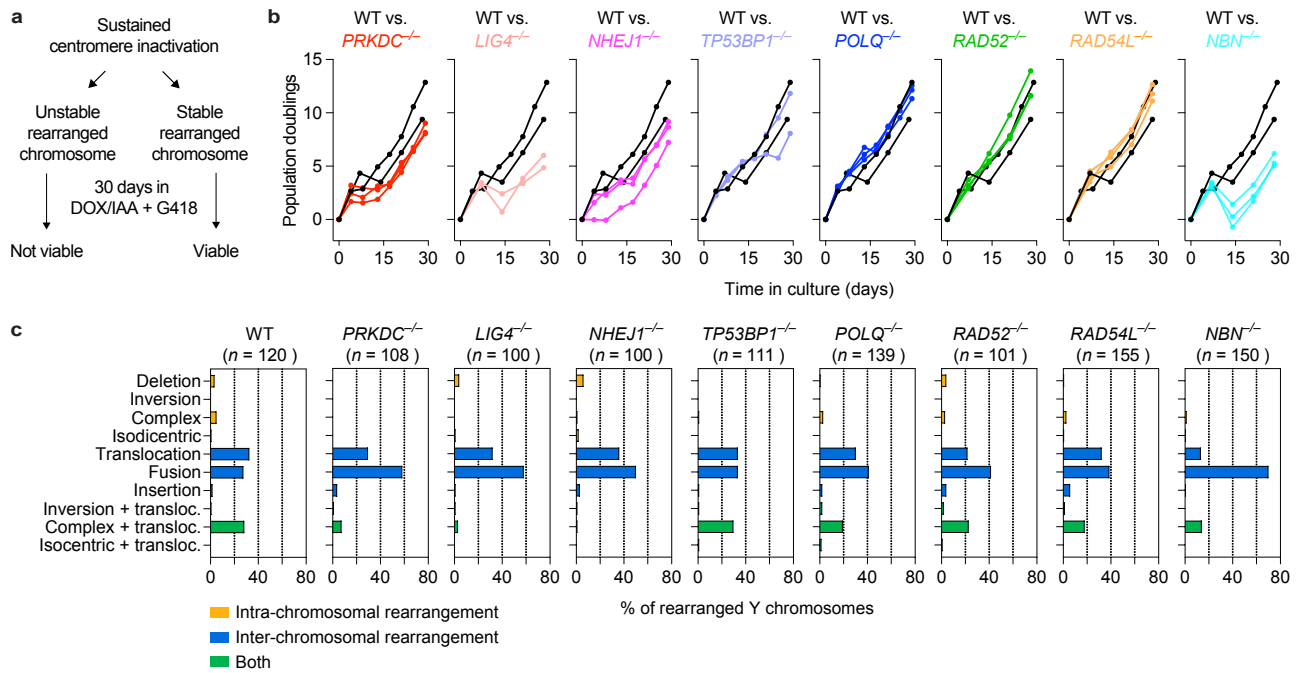

**Supplementary Fig. 4. Genomic rearrangement landscape of mis-segregated chromosomes following sustained centromere inactivation.**

**a)** Schematic of turnover between proliferating cells harboring stable Y chromosome rearrangements and dying cells that are unable to maintain the Y-encoded neoR marker. **b)** Plots of cumulative cell doublings over a 30d period in the presence of DOX/IAA and G418. Each curve represents an individual clone except for WT, which represent independent experiments using the same cell line. **c)** Distribution of Y chromosome rearrangement types as determined by metaphase FISH following continuous passaging in DOX/IAA and G418. Sample sizes indicate the number of rearranged Y chromosomes examined; data are pooled from 2 independent experiments for WT cells or 2-3 independent KO clones per gene. Source data are provided as a Source Data file.

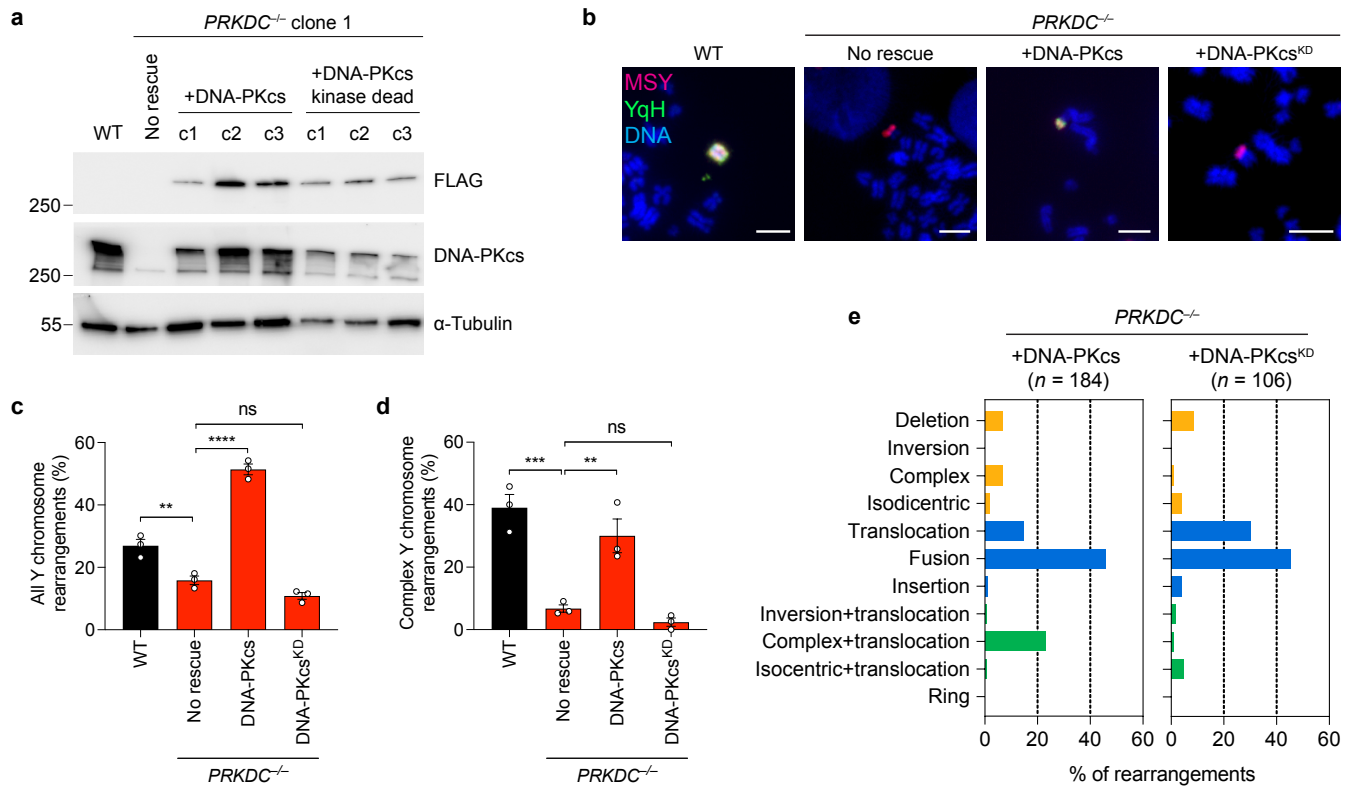

**Supplementary Fig. 5. Characterization of genomic rearrangements in DNA-PKcs-deficient cells.**

**a**) Immunoblot confirmation of DNA-PKcs KO cells expressing either FLAG-tagged WT (WT) or kinase-dead (KD) DNA-PKcs. Molecular weight markers are indicated in kilodaltons. **b**) Examples of Y chromosome rearrangements detected by metaphase FISH using the indicated sets of probes. Scale bar, 5  $\mu$ m. **c**) Frequency of Y chromosome rearrangements in DNA-PKcs KO cells complemented with WT or kinase-dead (KD) DNA-PKcs. Data are pooled from (left to right): 195, 339, 390, and 365 metaphase spreads. **d**) Proportion of Y chromosome rearrangements that can be classified as complex in DNA-PKcs KO cells complemented with WT or KD DNA-PKcs. Data are pooled from (left to right): 70, 80, 184, and 106 metaphase spreads with Y chromosome rearrangements. Bar graphs in panels (c-d) represent the mean  $\pm$  SEM of  $n = 3$  independent experiments for WT and DNA-PKcs KO,  $n = 3$  independent DNA-PKcs rescue clones. Statistical analyses were calculated by ordinary one-way ANOVA test with multiple comparisons. ns, not significant; \*\* $p \leq 0.01$ ; \*\*\* $p \leq 0.001$ ; \*\*\*\* $p \leq 0.0001$ . **e**) Distribution of Y chromosome rearrangement types as determined by metaphase FISH following 3d DOX/IAA treatment and G418 selection. Sample sizes indicate the number of rearranged Y chromosomes examined; data are pooled from 3 independent clones per condition. Source data are provided as a Source Data file.

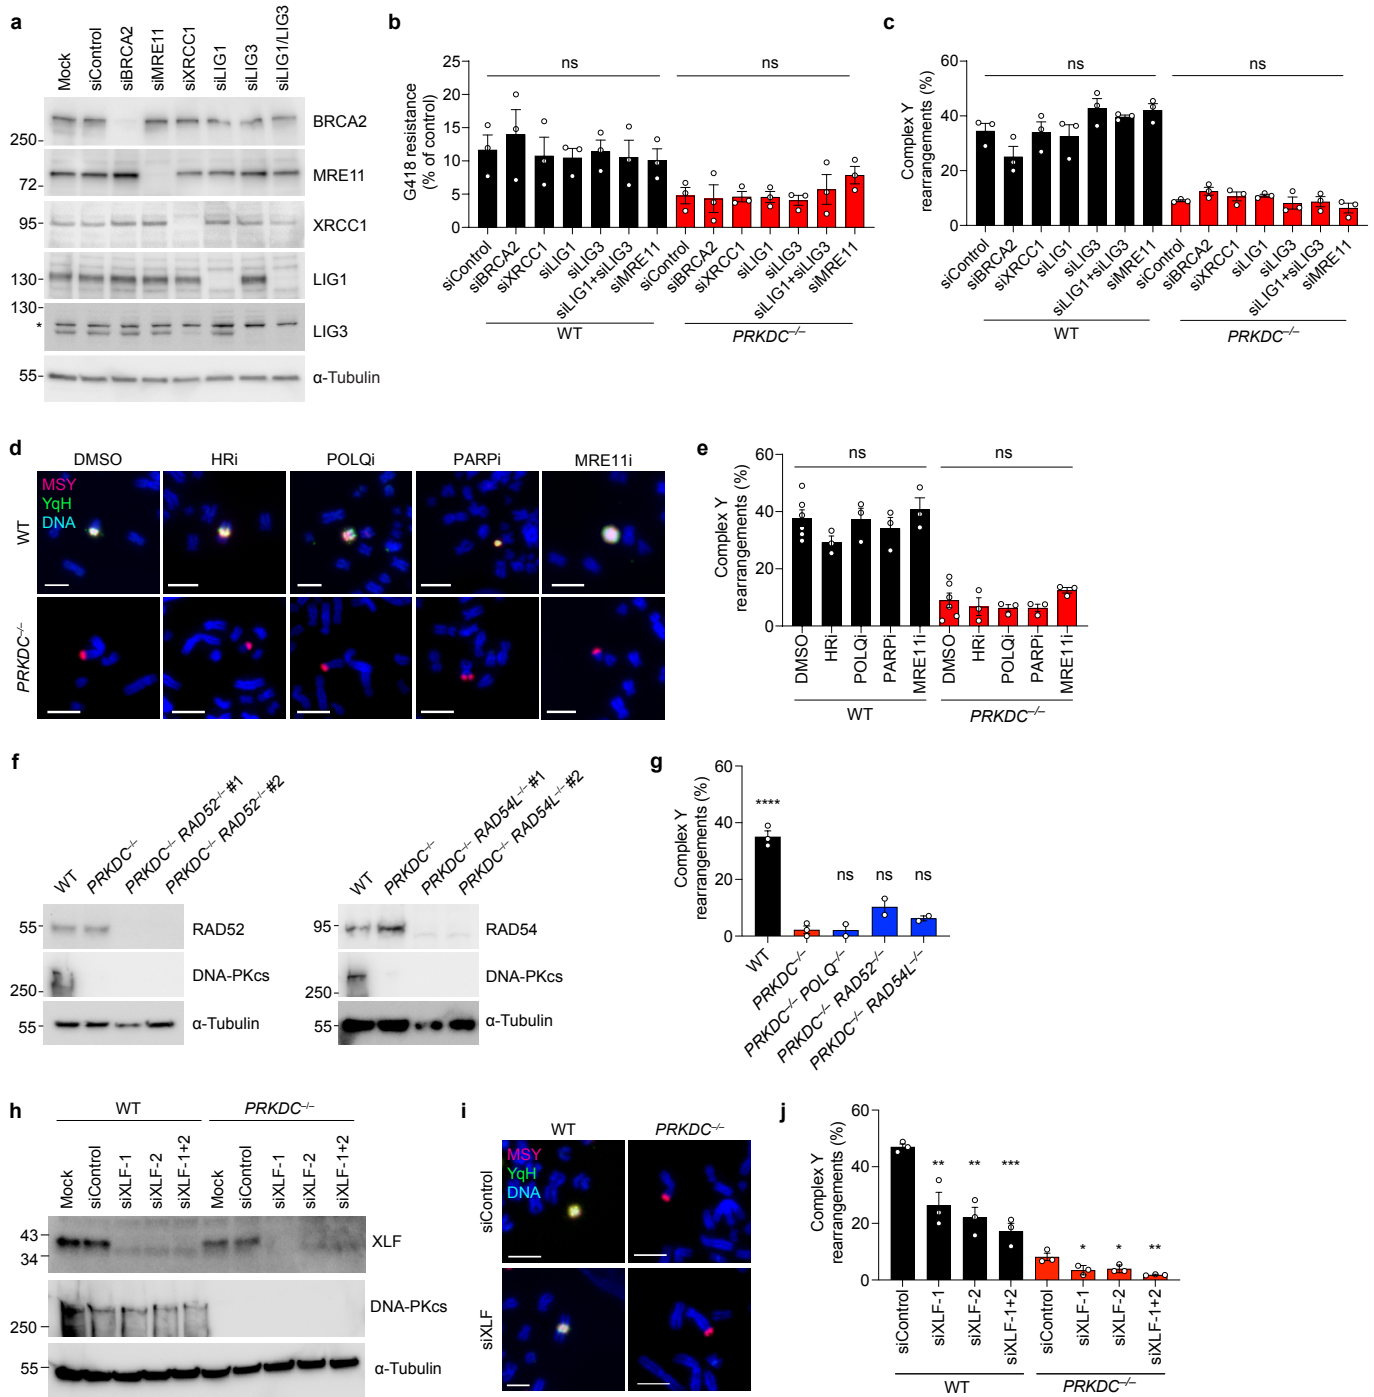

**Supplementary Fig. 6. Complex rearrangements in DNA-PKcs-deficient cells arise from functional redundancies of the NHEJ pathway.**

**a**) Immunoblot confirmation of protein depletion using the indicated siRNAs. Asterisk represents non-specific band. **b**) Viability of WT and DNA-PKcs KO cells (clone #1) upon siRNA-mediated depletion of the indicated DSB repair factors, treatment with DOX/IAA, and selection with G418. Data represent mean  $\pm$  SEM from  $n = 3$  independent experiments. **c**) Frequency of complex rearrangements in WT cells and DNA-PKcs KO cells upon siRNA-mediated depletion of indicated DSB repair factors, treatment with DOX/IAA, and selection with G418. Data represent mean  $\pm$  SEM from  $n = 3$  independent experiments pooled from (left to right): 90, 80, 98, 105, 95, 88, 87, 100, 74, 102, 101, 109, 114, and 109 metaphase spreads with Y chromosome rearrangements. **d**) Representative metaphase FISH images hybridized to the indicated probes from WT and DNA-PKcs KO cells with Y chromosome rearrangements after different small inhibitor treatment. Scale bar, 5  $\mu$ m. **e**) Frequency of complex rearrangements in WT and DNA-PKcs KO cells after treatment with the indicated small molecule inhibitors. Data represent mean  $\pm$  SEM from  $n = 6$  (DMSO) or  $n = 3$  (inhibitor treatment) independent experiments pooled from (left to right): 177, 147, 128, 135, and 112 metaphase spreads containing Y chromosome rearrangements. **f**) Immunoblot confirmation of double KO clones. **g**) Frequency of complex rearrangements in double KO cells. Data represent mean  $\pm$  SEM from  $n = 3$  independent experiments for WT and DNA-PKcs KO cells and  $n = 2$  clones per double KO genotype pooled from (left to right): 177, 147, 128, 135, and 112 metaphase spreads containing Y chromosome rearrangements. **h**) Immunoblot confirmation of XLF depletion using the indicated siRNAs. **i**) Representative metaphase FISH images hybridized to the indicated probes from WT and DNA-PKcs KO cells with Y chromosome rearrangements after depletion of XLF. Scale bar, 5  $\mu$ m. **j**) Frequency of complex rearrangements in WT and DNA-PKcs KO cells after depletion of XLF. Data represent mean  $\pm$  SEM from  $n = 3$  independent experiments pooled from (left to right): 134, 106, 95, 132, 152, 173, 180, and 168 metaphase spreads containing Y chromosome rearrangements. Statistical analyses for all plots were calculated by ordinary one-way ANOVA test with multiple comparisons. ns, not significant; \* $p \leq 0.05$ ; \*\* $p \leq 0.01$ ; \*\*\* $p \leq 0.001$ ; \*\*\*\* $p \leq 0.0001$ . Molecular weight markers in panels **(a)**, **(f)**, and **(h)** are indicated in kilodaltons. Source data are provided as a Source Data file.

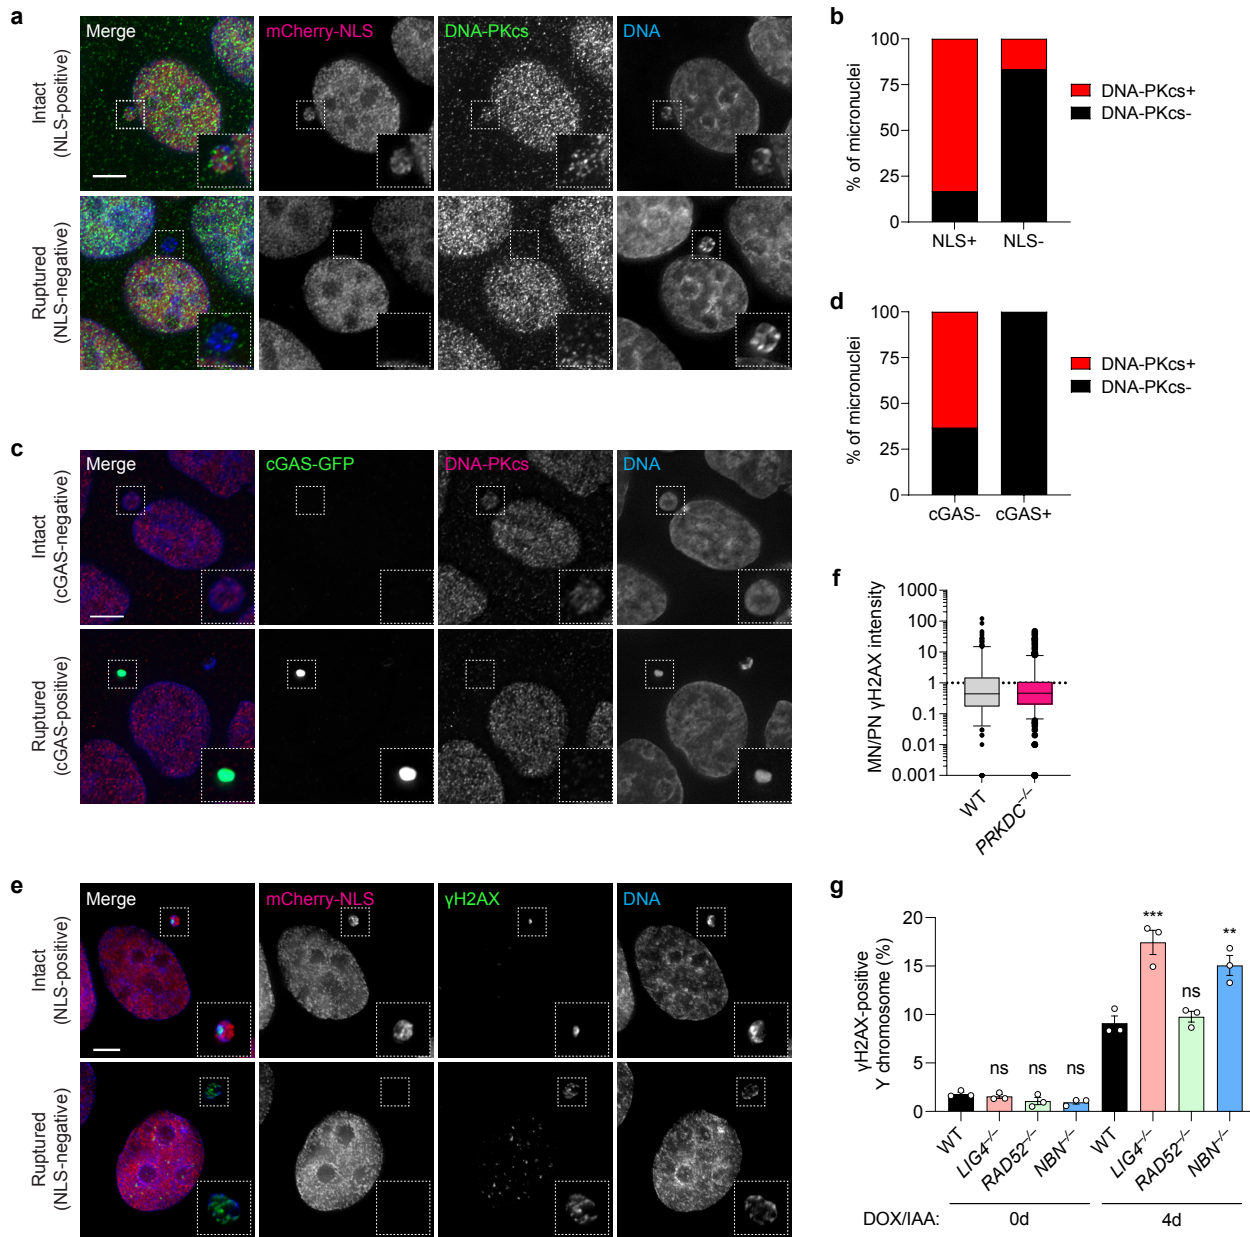

**Supplementary Fig. 7. Nuclear envelope rupture triggers the loss of DNA-PKcs from micronuclei.**

**a**) Representative immunofluorescent images of DNA-PKcs in DLD-1 cells expressing mCherry fused to a nuclear localization signal (NLS) with intact (NLS-positive) or ruptured (NLS-negative) micronuclei. **b**) Proportion of intact and ruptured micronuclei with detectable levels of DNA-PKcs. Data represent  $n = 149$  interphase cells with micronuclei. **c**) Representative immunofluorescent images of DNA-PKcs in DLD-1 cells expressing cGAS-GFP with intact (cGAS-negative) or ruptured (cGAS-positive) micronuclei. **d**) Proportion of intact and ruptured micronuclei with detectable levels of DNA-PKcs. Data represent  $n = 151$  interphase cells with micronuclei. **e**) Representative immunofluorescent images of  $\gamma$ H2AX in DNA-PKcs KO DLD-1 cells expressing mCherry-NLS with intact or ruptured micronuclei. **f**) Fluorescence intensity of  $\gamma$ H2AX in WT and DNA-PKcs KO micronuclei compared to their corresponding primary nucleus. Data represent 10-90 percentile from  $n = 207$  interphase cells with micronuclei for both WT and DNA-PKcs KO. Scale bar for panels **(a)**, **(c)**, and **(e)**,  $5 \mu\text{m}$ . **g**) Frequency of Y chromosomes marked by extensive  $\gamma$ H2AX in the nucleus before and after 4-day DOX/IAA treatment. Data represent the mean  $\pm$  SEM of  $n = 3$  independent experiments from (left to right): 615, 657, 695, 699, 570, 523, 691, and 562 cells. Statistical analyses were calculated by ordinary one-way ANOVA test with multiple comparisons. ns, not significant; \*\* $p \leq 0.01$ ; \*\*\* $p \leq 0.001$ . Source data are provided as a Source Data file.

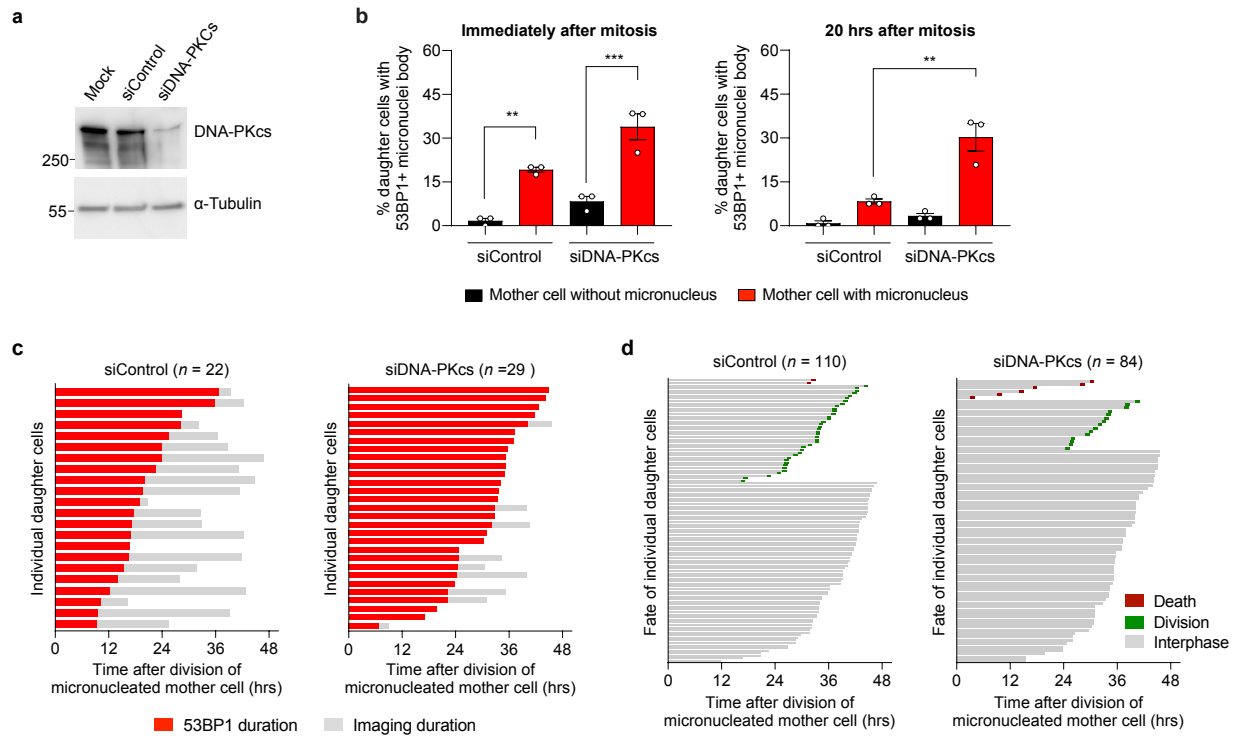

**Supplementary Fig. 8. Depletion of DNA-PKcs prolongs 53BP1 residence time at MN bodies and triggers cell cycle arrest.**

**a**) Immunoblot confirmation of DNA-PKcs depletion by siRNAs. **b**) Frequency of Halo-53BP1-labeled MN body formation and persistence. Data represent mean  $\pm$  SEM of  $n = 3$  independent experiments pooled from (left to right): 60, 55, 60, and 42 micronucleated mother cells. Statistical analyses were calculated by ordinary one-way ANOVA test with multiple comparisons. ns, not significant; \*\* $p \leq 0.01$ ; \*\*\* $p \leq 0.001$ . **c**) Duration of Halo-53BP1 residence time from panel **(b)** after MN body formation in individual daughter cells with or without siRNA-mediated depletion of DNA-PKcs. **d**) Fate of daughter cells after division of micronucleated mother cells upon siRNA-mediated depletion of DNA-PKcs. Sample sizes in panels **(c-d)** represent individual daughter cells. Source data are provided as a Source Data file.

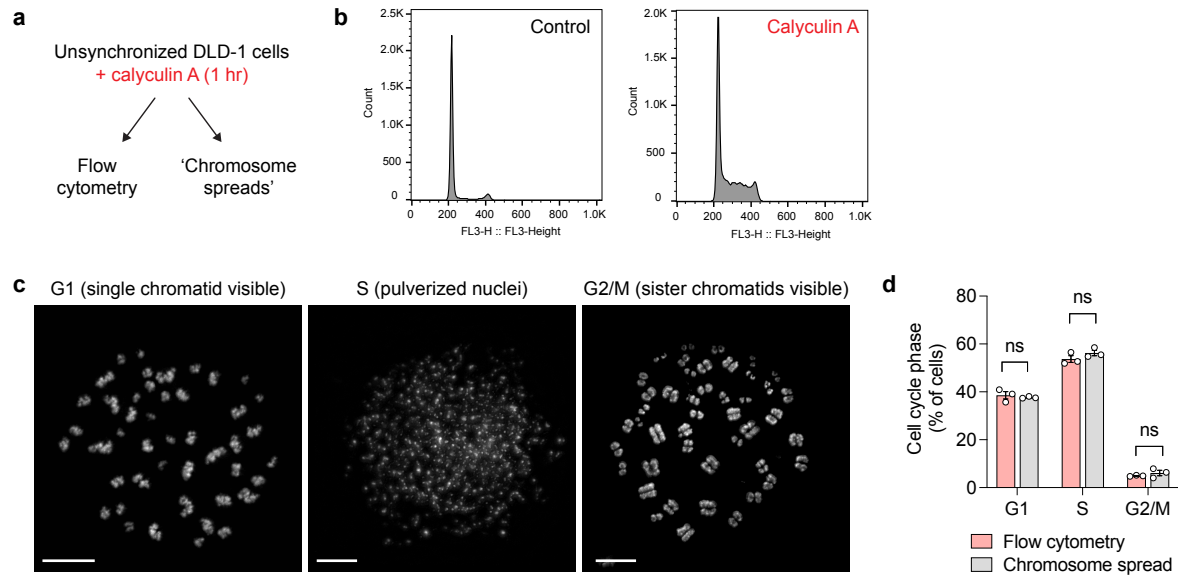

**Supplementary Fig. 9. Characterization of calyculin A-induced premature chromosome condensation.**

**a)** Unsynchronized DLD-1 cells were stimulated with calyculin A and analyzed for cell cycle stage by flow cytometry or preparation of chromosome spreads. **b)** Representative cell cycle profiles by flow cytometry. **c)** Examples of 'metaphase-like' chromosome spreads following induction of premature chromosome condensation with calyculin A for cells in the indicated cell cycle stages. Scale bar, 10  $\mu$ m. **d)** Comparison of cell cycle distribution by flow cytometry versus microscopic analysis of chromosome spreads. Data represent mean  $\pm$  SEM of  $n = 3$  independent experiments from 53,326 flow-sorted cells and 1,103 chromosome spreads. Statistical analyses were calculated by two-tailed unpaired Student's t-test as indicated. ns, not significant. Source data are provided as a Source Data file.

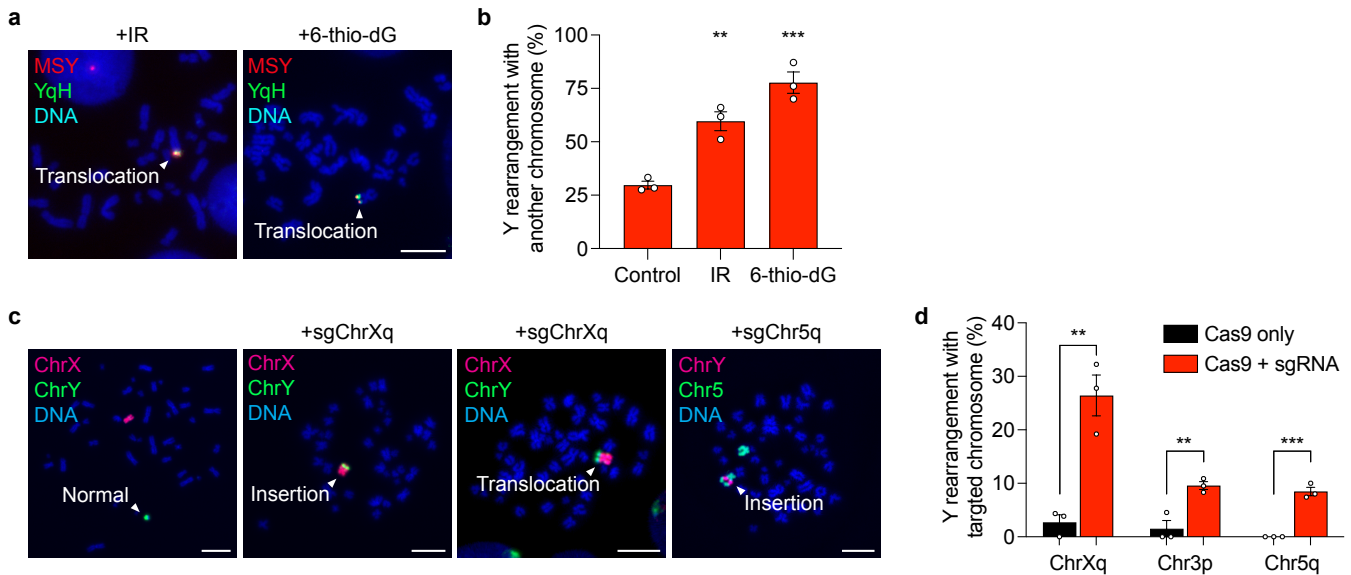

**Supplementary Fig. 10. Induction of genome-wide or Cas9-induced DNA breaks on nuclear chromosomes facilitates translocations involving the micronucleated chromosome.**

**a)** Representative images of metaphase spreads hybridized to the indicated FISH probes showing examples of Y chromosome translocations. Scale bar, 10  $\mu$ m. **b)** Frequency of inter-chromosomal rearrangements in cells following 3d DOX/IAA treatment, exposure to IR (2 Gy) or 6-thio-dG, and G418 selection. Data represent mean  $\pm$  SEM of  $n = 3$  independent experiments from (left to right): 222, 231, and 152 metaphase spreads with Y chromosome rearrangements. **c)** Representative images of metaphase spreads hybridized to the indicated FISH probes showing examples of normal or rearranged Y chromosomes with the indicated translocation partner. Scale bar, 10  $\mu$ m. **d)** Frequency of Y chromosome rearrangements with the CRISPR/Cas9-targeted chromosome. Data represent mean  $\pm$  SEM of  $n = 3$  independent experiments from (left to right): 60, 75, 78, 115, 84, and 77 metaphase spreads with Y chromosome rearrangements. Statistical analyses were calculated by ordinary one-way ANOVA test with multiple comparisons for panel (b) and by two-tailed unpaired Student's t-test for panel (d). \*\* $p \leq 0.01$ ; \*\*\* $p \leq 0.001$ . Source data are provided as a Source Data file.

**Supplementary Table 1. List of oligonucleotides sequences used in this study.**

| <b>Gene</b>               | <b>Sequence (5' to 3') or Source</b>              |
|---------------------------|---------------------------------------------------|
| <i>NHEJ1</i> – sgRNA 1    | ctcttaggagctgaacaag                               |
| <i>NHEJ1</i> – sgRNA 2    | ggagaaggtagctcgcta                                |
| <i>PRKDC</i> – sgRNA 1    | tccccctctggcatctgcg                               |
| <i>PRKDC</i> – sgRNA 2    | gaaacgtccgcttatagagc                              |
| <i>LIG4</i> – sgRNA 1     | agaacaccactggaactca                               |
| <i>LIG4</i> – sgRNA 2     | ttgctaattacctagaga                                |
| <i>LIG4</i> – sgRNA 3     | gaaagagagagaatggccta                              |
| <i>TP53BP1</i> – sgRNA 1  | cagaatcatcctctagaacc                              |
| <i>TP53BP1</i> – sgRNA 2  | acgaggagacggtaatagt                               |
| <i>POLQ</i> – sgRNA 1     | gtagagttcagcattcaacc                              |
| <i>POLQ</i> – sgRNA 2     | ctgactccaaaagcggta                                |
| <i>RAD52</i> – sgRNA 1    | gtgctacattgagggtcatc                              |
| <i>RAD52</i> – sgRNA 2    | tccatcacgcagcagaatgt                              |
| <i>RAD54L</i> – sgRNA 1   | gtcaccagtcggcgcatccc                              |
| <i>RAD54L</i> – sgRNA 2   | gtgcaagccagaaattgaca                              |
| <i>NBN</i> – sgRNA 1      | caagaagagcatgcaaccaa                              |
| <i>NBN</i> – sgRNA 2      | agaatgcactcaccttgta                               |
|                           |                                                   |
| <i>NHEJ1</i> – primer 1   | ccttcgtgtaaccagggt                                |
| <i>NHEJ1</i> – primer 2   | accatccagggtctacctca                              |
| <i>PRKDC</i> – primer 1   | taaacattgctgacctctggt                             |
| <i>PRKDC</i> – primer 2   | tcttcccttgtgaaagactacg                            |
| <i>LIG4</i> – primer 1    | tcagacacttcagggaattttaga                          |
| <i>LIG4</i> – primer 2    | tgctcaagtgtgaactctga                              |
| <i>TP53BP1</i> – primer 1 | cattccaggggagcagatgg                              |
| <i>TP53BP1</i> – primer 2 | cgcagataccacagtaggctt                             |
| <i>POLQ</i> – primer 1    | gttggcatgagtgtacct                                |
| <i>POLQ</i> – primer 2    | cttcactgtgacatgggc                                |
| <i>RAD52</i> – primer 1   | gtgtggaaggaattaacacagctt                          |
| <i>RAD52</i> – primer 2   | gcagcagggtctactccatcc                             |
| <i>RAD54L</i> – primer 1  | aacgaggtatgggctatggg                              |
| <i>RAD54L</i> – primer 2  | gccatcttgttagggctcc                               |
| <i>NBN</i> – primer 1     | gccatctctgcaactctgatac                            |
| <i>NBN</i> – primer 2     | tgtcataaccttctcgggtgga                            |
|                           |                                                   |
| Control – siRNA           | CUACAUCCGAUCGAUGAUdTdT                            |
| <i>XLF</i> – siRNA1       | GCAUUACAGUGCCAAGUGAdTdT                           |
| <i>XLF</i> – siRNA2       | CGCUGAUUCGAGAUCGAUUGAdTdT                         |
|                           |                                                   |
| siControl                 | Dharmacon ON-TARGETplus siRNA (D-001810-10-05)    |
| siMRE11                   | Dharmacon ON-TARGETplus siRNA (L-009271-00-0005)  |
| siBRCA2                   | Dharmacon ON-TARGETplus siRNA (L-003462-00-00050) |



|            |                                                  |
|------------|--------------------------------------------------|
| siXRCC1    | Dharmacon ON-TARGETplus siRNA (L-009394-00-0005) |
| siLIG1     | Dharmacon ON-TARGETplus siRNA (L-011076-00-0005) |
| siLIG3     | Dharmacon ON-TARGETplus siRNA (L-009227-00-0005) |
| siDNA-PKcs | Dharmacon ON-TARGETplus siRNA (L-005030-00-0005) |

**Supplementary Table 2. List of primary antibodies used in this study.**

| <b>Antibody</b>              | <b>Source</b>                             |
|------------------------------|-------------------------------------------|
| $\alpha$ -Tubulin            | Cell Signaling 3873                       |
| 53BP1                        | Novus NB100-304                           |
| BRCA2                        | Cell Signaling 10741                      |
| LIG4                         | Cell Signaling 14649                      |
| DNA-PKcs                     | Abcam ab44815 (a gift from Benjamin Chen) |
| FLAG                         | Sigma F1804                               |
| GFP                          | Cell Signaling 2555                       |
| Histone H2A.X (phospho S139) | Cell Signaling 2577                       |
| Histone H2A.X (phospho S139) | Millipore 05-636                          |
| LIG1                         | Proteintech 18051-1-AP                    |
| LIG3                         | Fisher Scientific A301637AT               |
| mCherry                      | Cell Signaling 43590S                     |
| MRE11                        | Proteintech 10744-1-AP                    |
| NBS1                         | Cell Signaling 14956                      |
| RAD52                        | Santa Cruz sc-365341                      |
| RAD54                        | Cell Signaling 15016                      |
| XRCC1                        | Proteintech 21468-1-AP                    |
| XLF                          | Cell Signaling 2854                       |

# Supplementary Figure 1c (also see next page)

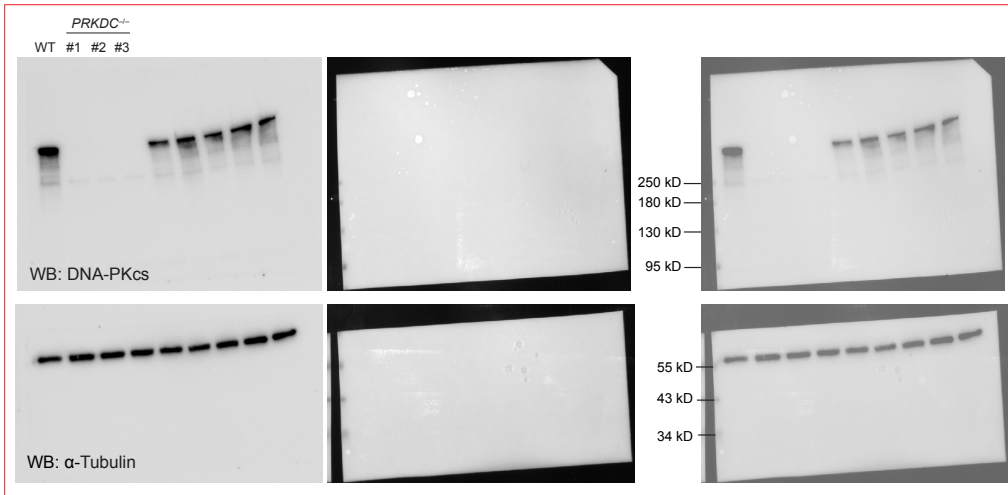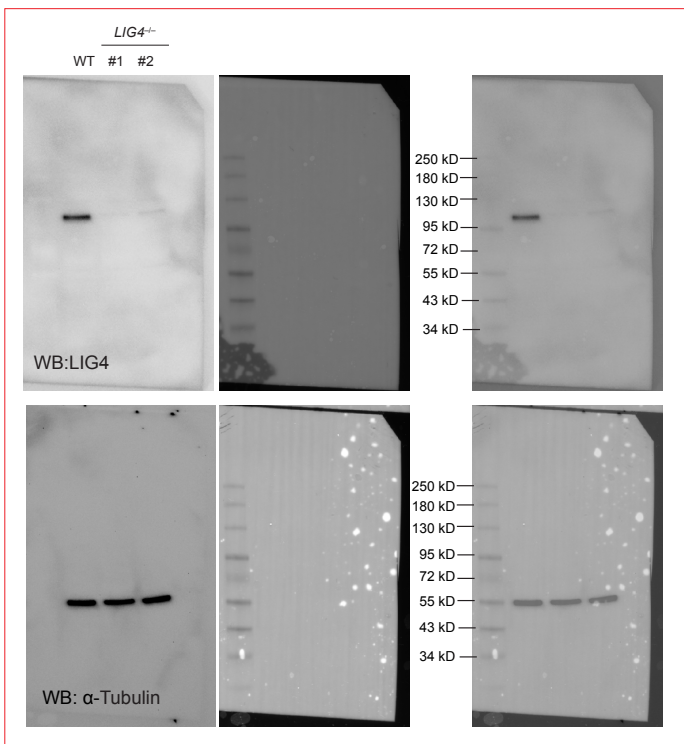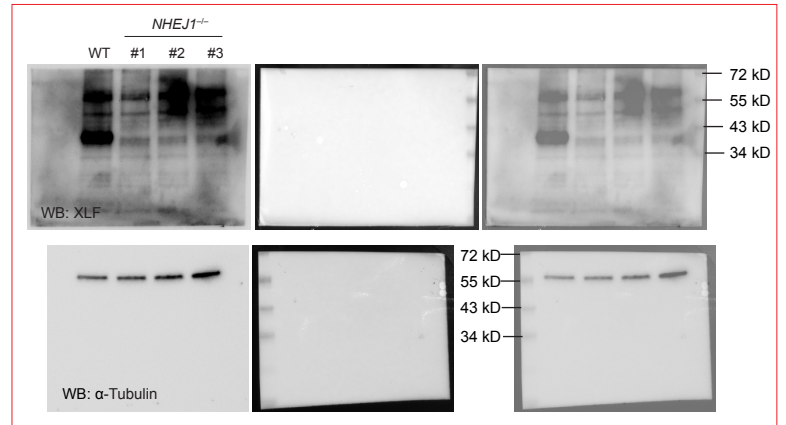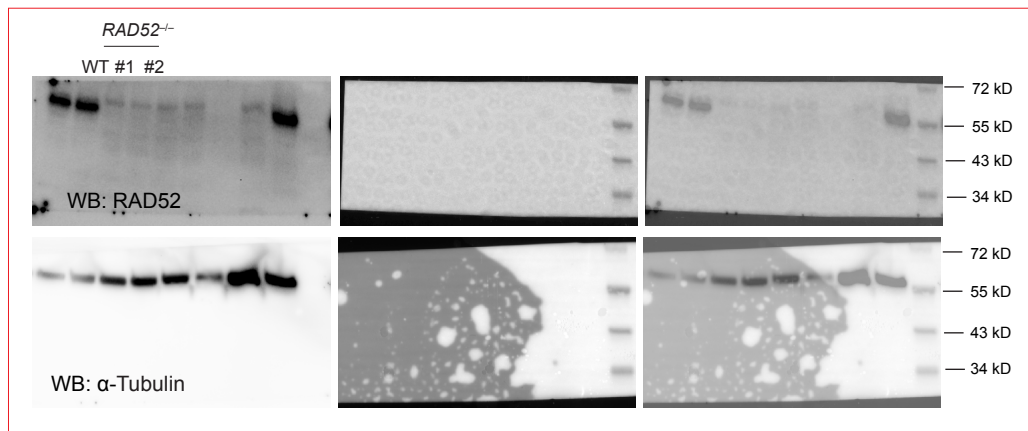

### Supplementary Figure 1c (continued)

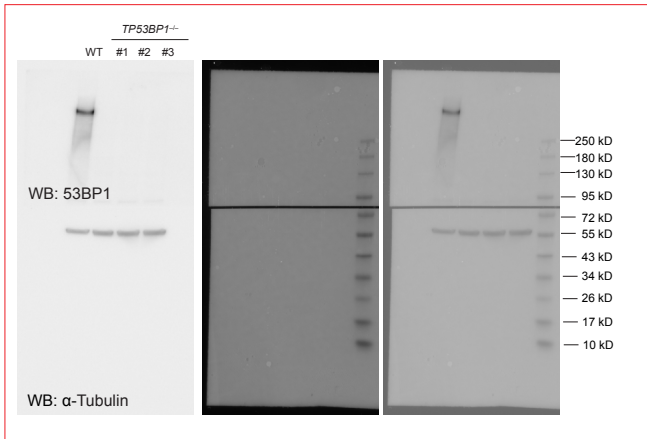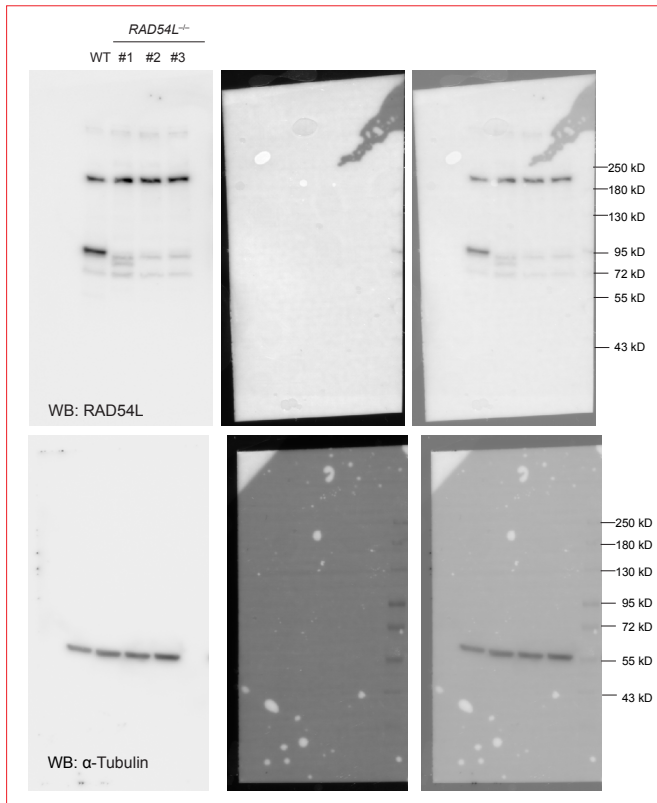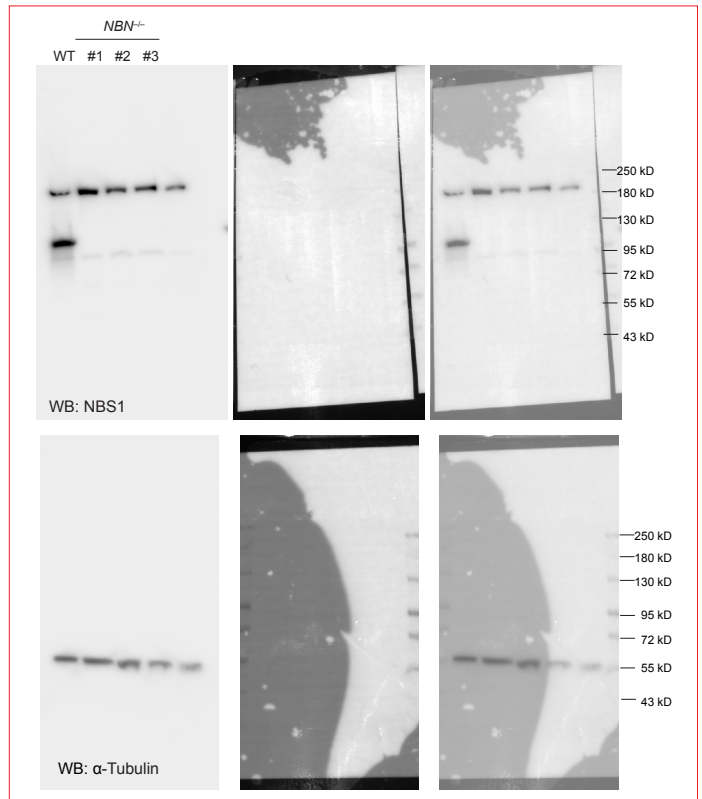

# Supplementary Figure 5a

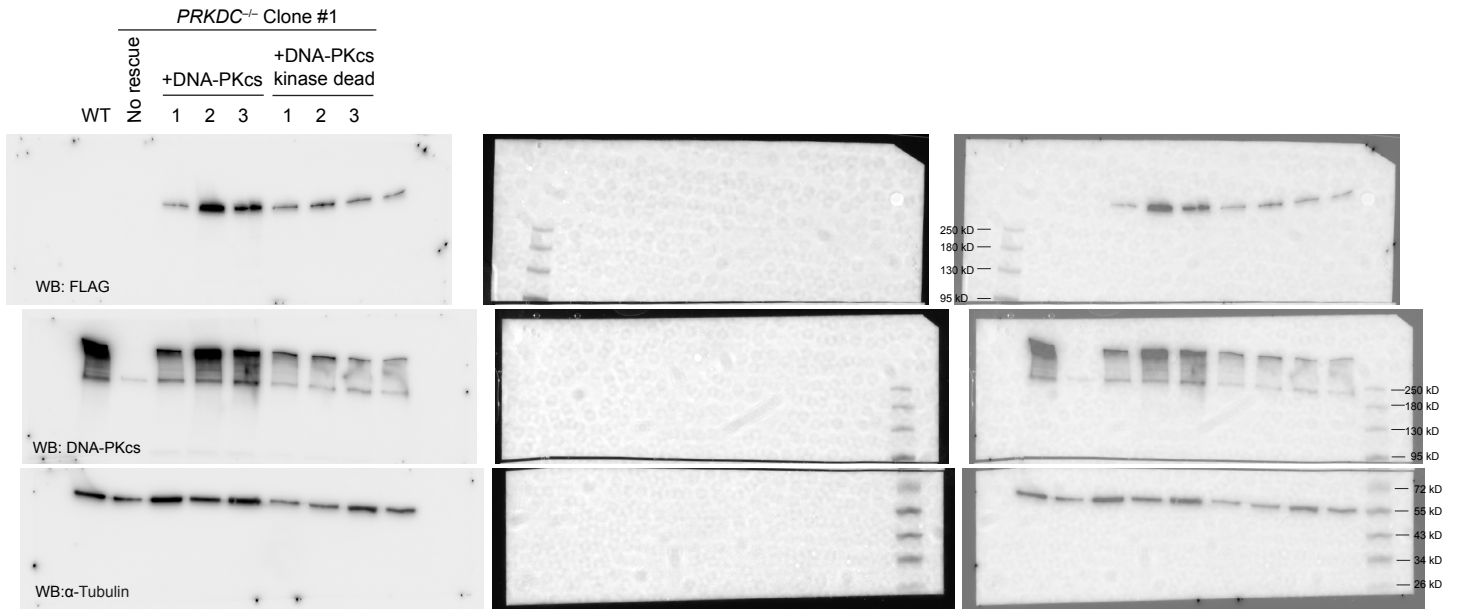

# Supplementary Figure 6a

Mock  
siControl  
siBRCA2  
siMRE11  
siXRCC1  
siLIG1  
siLIG3  
siLIG1/LIG3

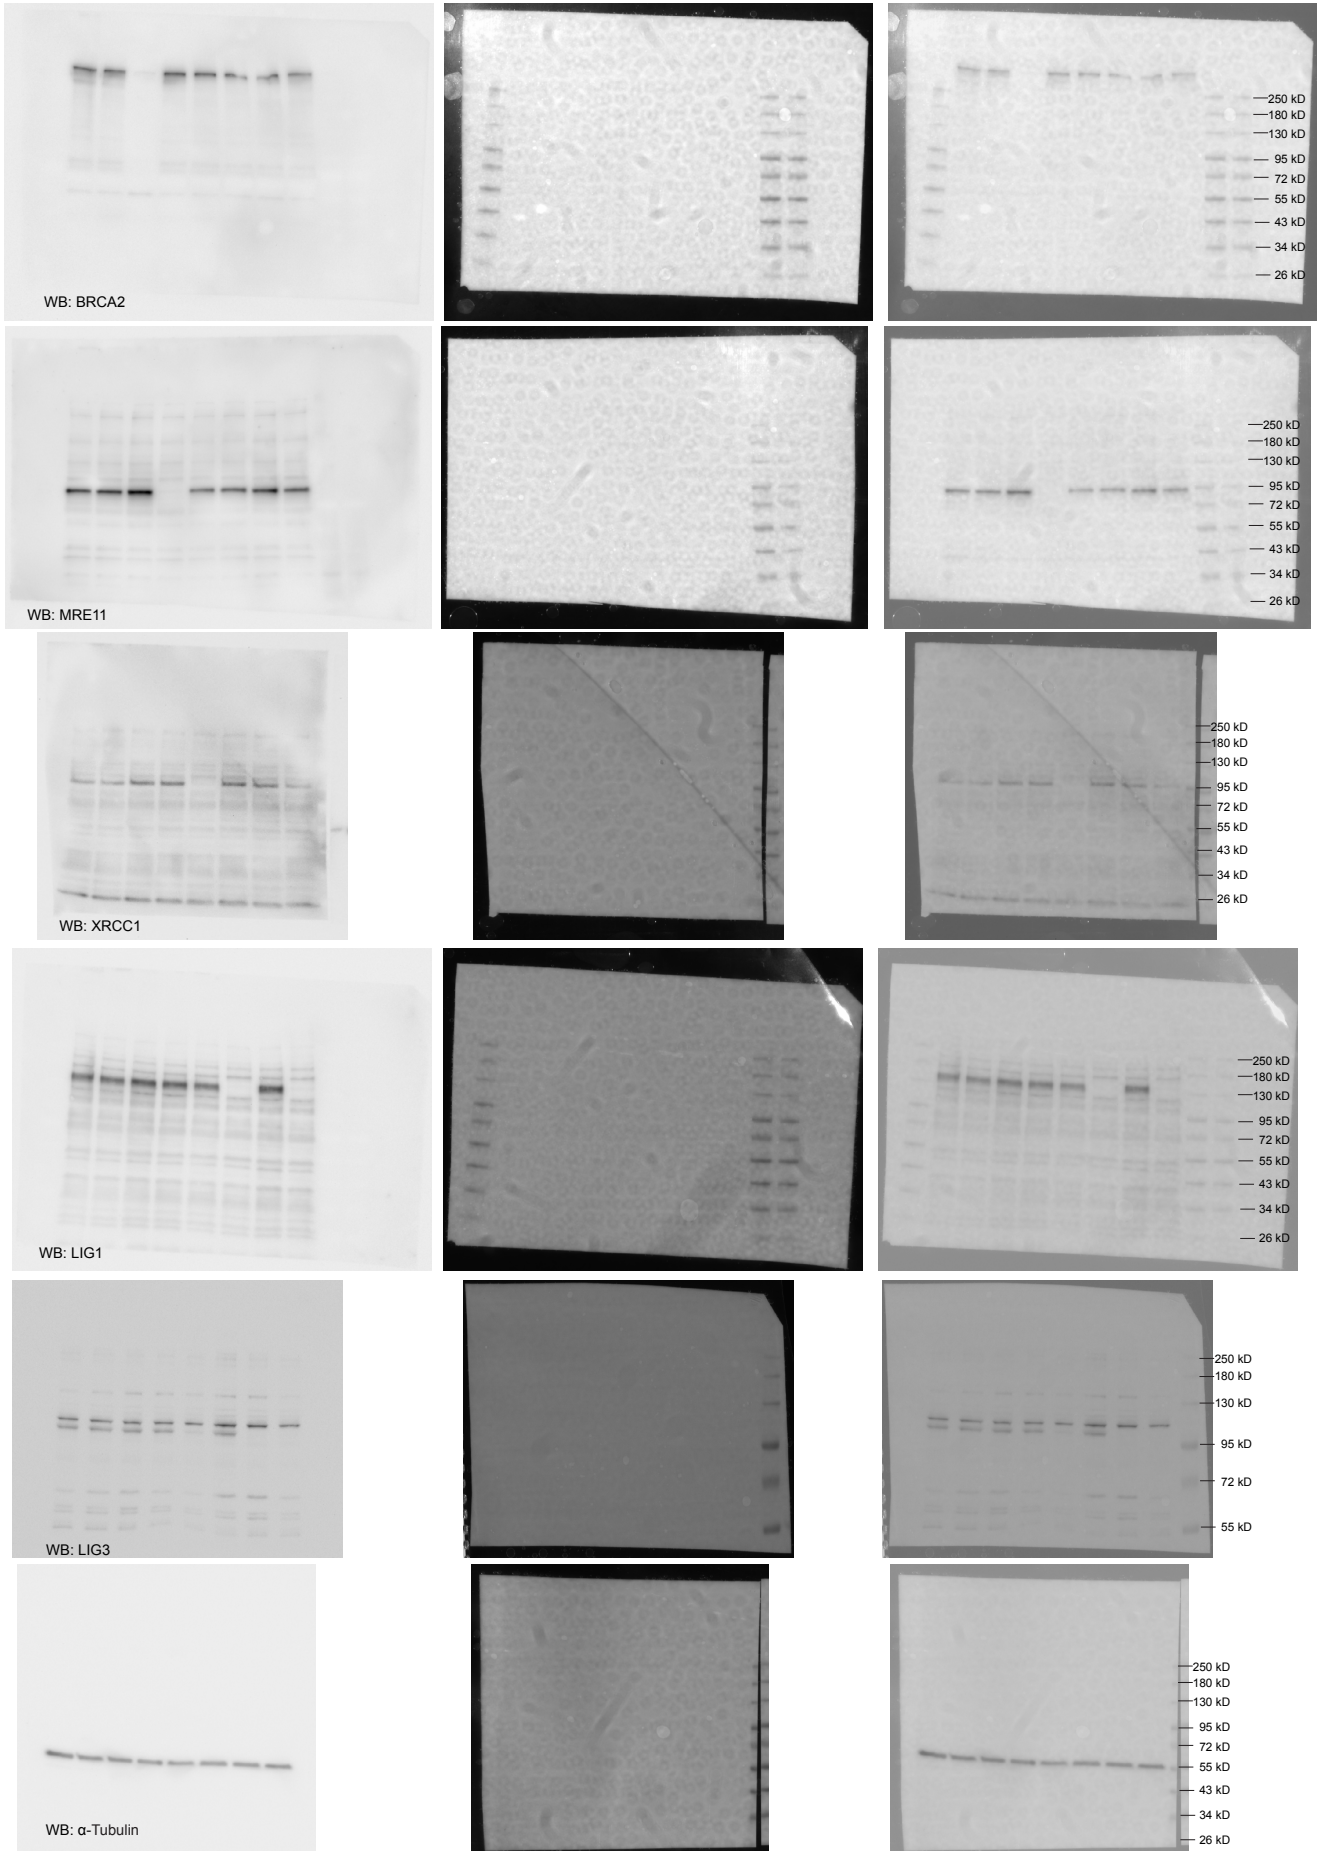

## Supplementary Figure 6f

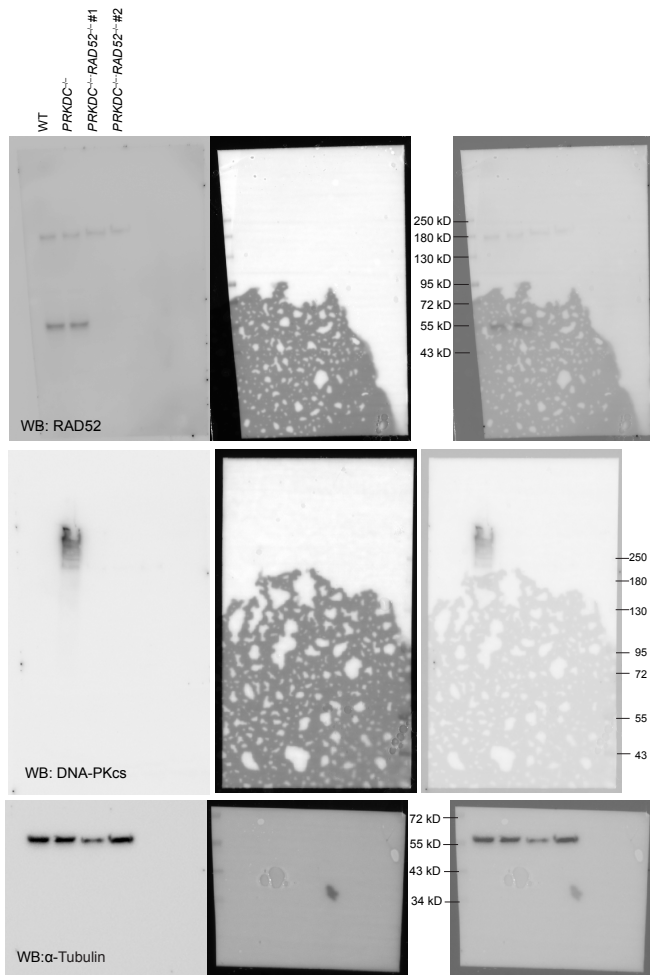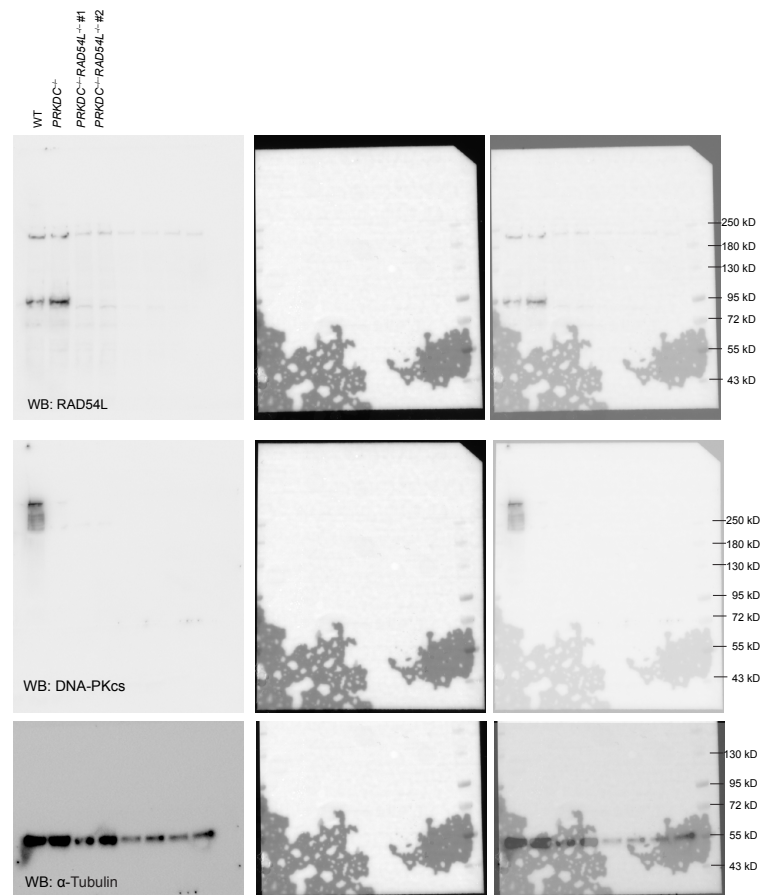



Supplementary Figure 6h

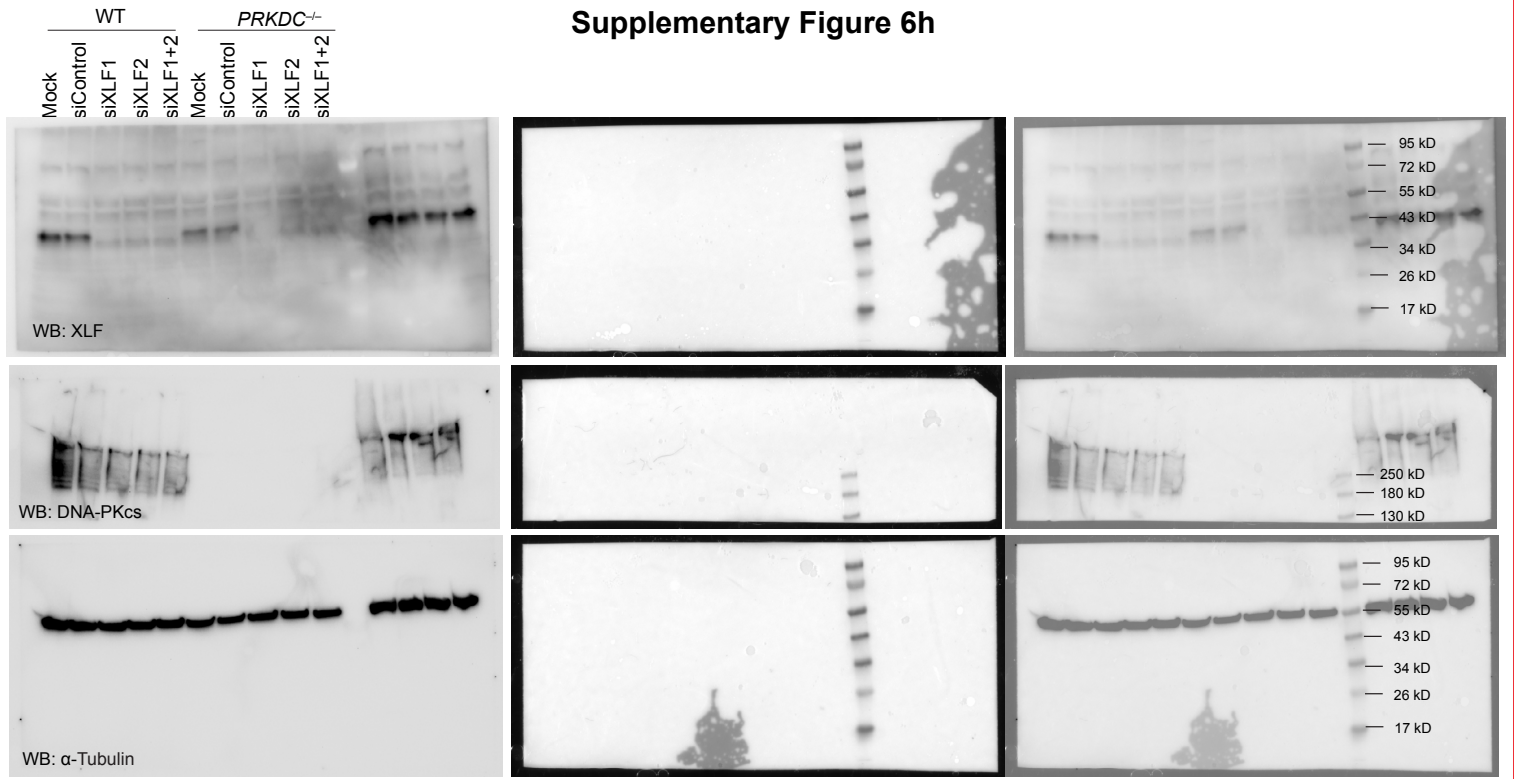

Supplementary Figure 8a

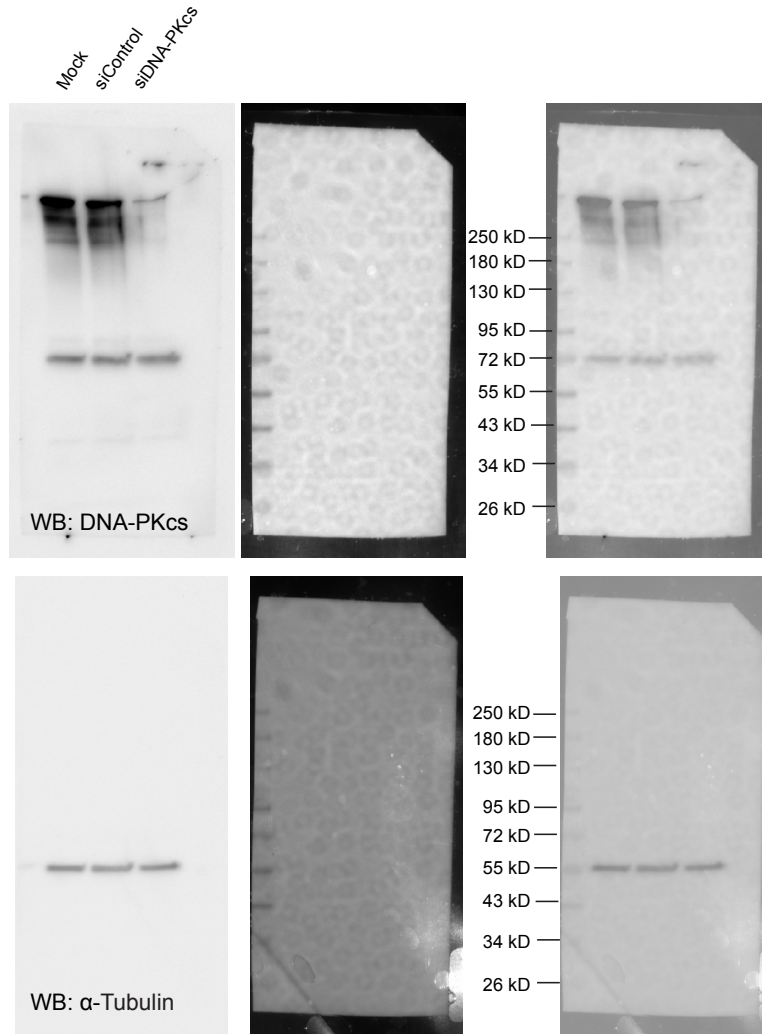



# FACS Gating Strategies

## Supplementary Fig. 1f – DR-GFP assay

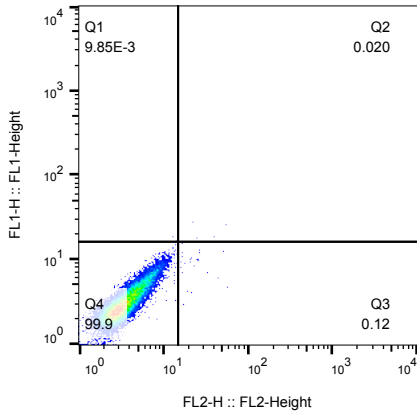

Negative control

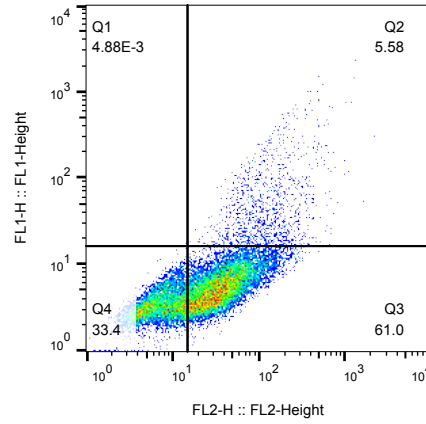

Example plot from one sample after transfection

- Q1 (GFP positive)
- Q2 (GFP/RFP double positive)
- Q3 (RFP positive)
- Q4 (Negative)

## Supplementary Fig. 9b – Cell cycle profiling

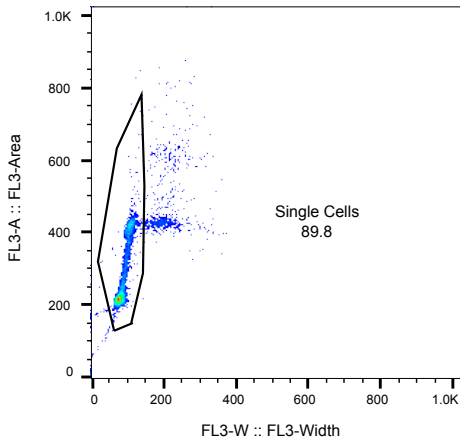

Doublet exclusion

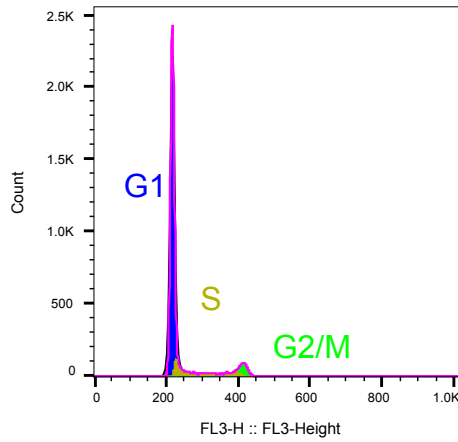

Cell cycle fitting
